# Supplementary material
Source: PubMed Central journal article supplement (PMC2855267)

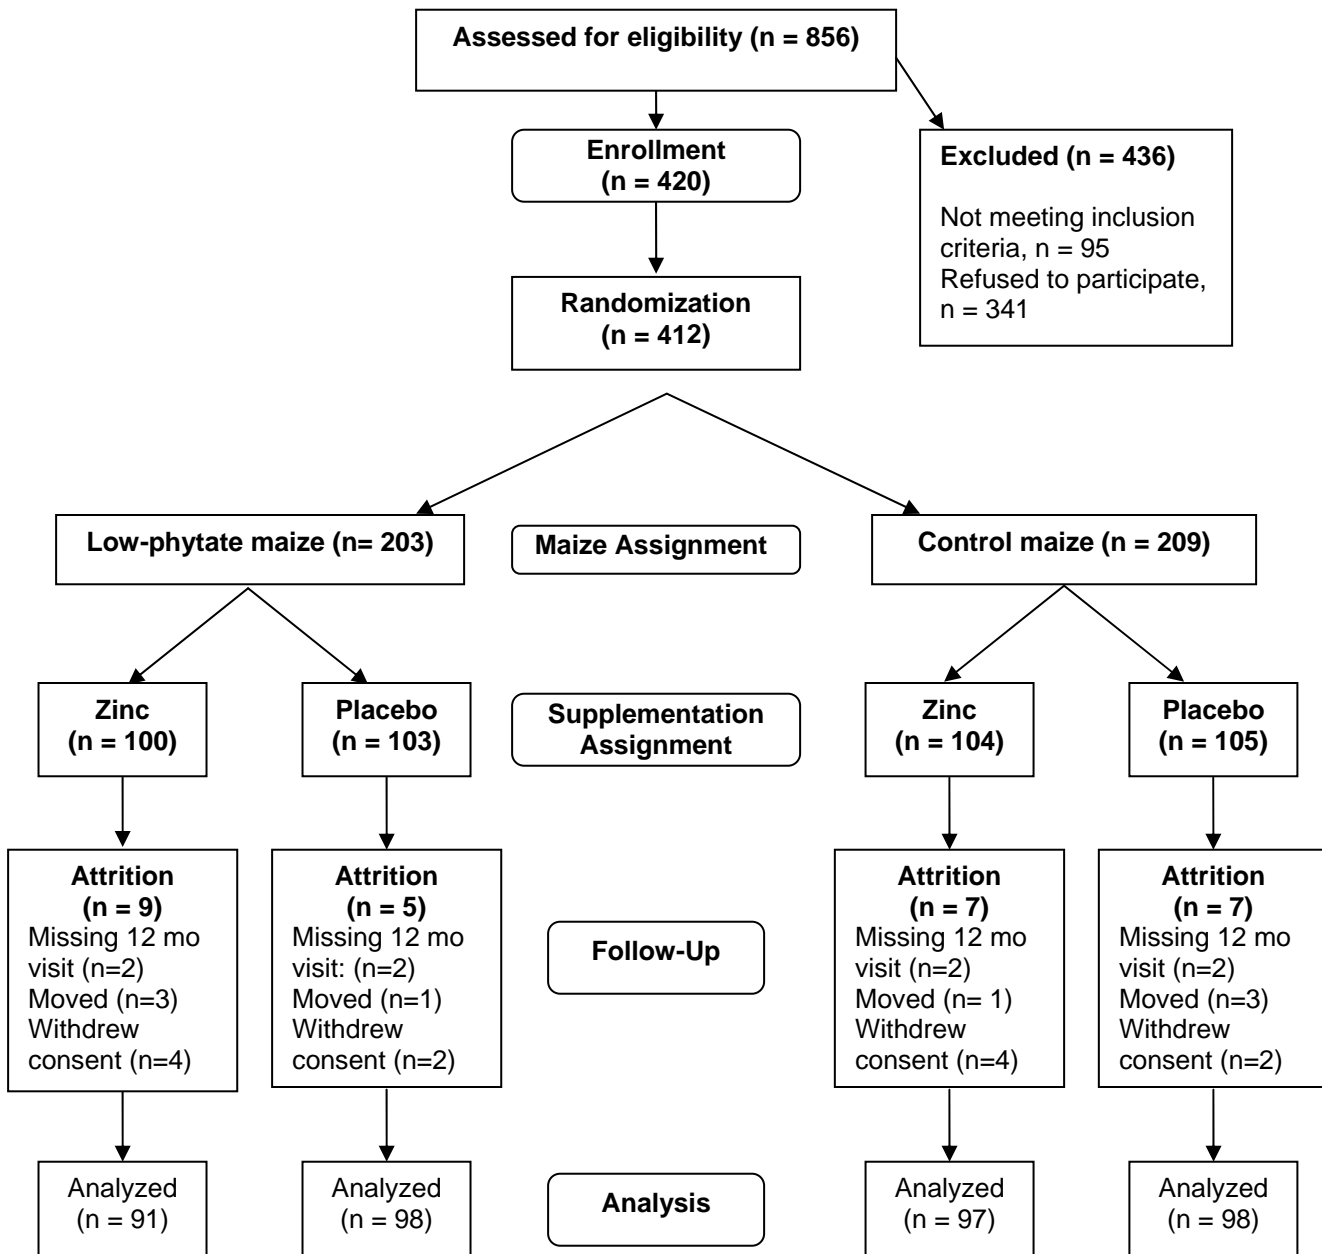

Supplemental Figure 1. Consort diagram of study

Supplement: jn.109.115154_1.pdf [file jn.109.115154_1.pdf]
